# Supplementary material for: Complex Machine-Learning Algorithms and Multivariable Logistic Regression on Par in the Prediction of Insufficient Clinical Response to Methotrexate in Rheumatoid Arthritis
Source: J Pers Med. 2021 Jan 14;11(1):44. doi: 10.3390/jpm11010044 (PMC7828730; doi:10.3390/jpm11010044)
Supplement: Supplementary file 1 [file jpm-11-00044-s001.pdf]

## Supplementary Files

**Table S1.** Algorithm performances on the train set (N = 249)

| Algorithm           | AUC  |
|---------------------|------|
| Logistic regression | 0.72 |
| LASSO regression    | 0.73 |
| Random Forest       | 0.71 |
| XGBoost             | 0.73 |

Algorithms performances are the result of 10-fold cross validation on the train set. 50% were insufficient responders. Insufficient response was determined at 3 months (DAS28>3.2)

**Supplementary Figure S1.** ROC curve of models tested on test set (N=106) after feature selection.

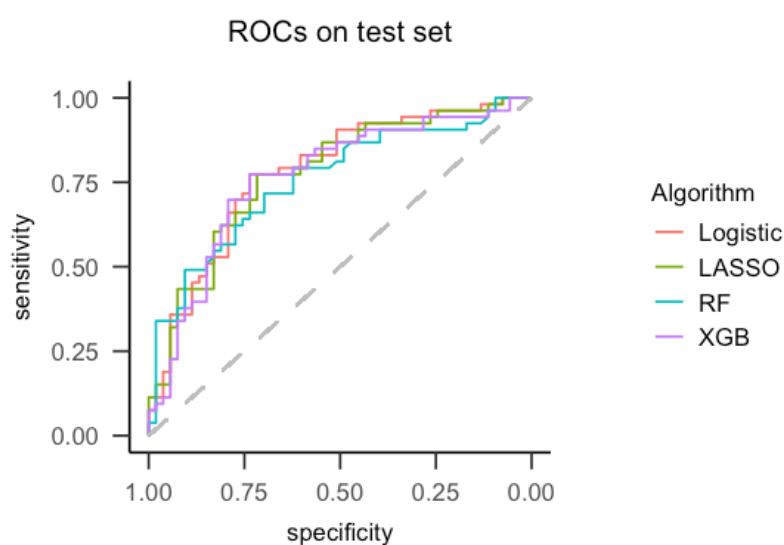

Features included in the model were: TJC28, HAQ, BMI, smoking, ESR, DMARD/cortico use  
 Logistic= logistic regression, LASSO= LASSO regression, RF= random forest, XGB= XGBoost

**Supplementary Figure S2.** Confusion matrices on test set (N=106) after feature selection. Features included in the model were: TJC28, HAQ, BMI, smoking, ESR, DMARD/cortico use. Thresholds were chosen where sensitivity was highest and specificity was at least 0.60. Grey-scale cells are correctly identified patients. IR=insufficient responder (DAS28 >3.2), R=sufficient responder (DAS28 ≤3.2)

**Logistic regression**

|           |    | Actual response   |                   |
|-----------|----|-------------------|-------------------|
|           |    | IR<br>(DAS28>3.2) | R<br>(DAS28 ≤3.2) |
| Predicted | IR | 44                | 21                |
|           | R  | 9                 | 32                |

**LASSO**

|           |    | Actual response   |                   |
|-----------|----|-------------------|-------------------|
|           |    | IR<br>(DAS28>3.2) | R<br>(DAS28 ≤3.2) |
| Predicted | IR | 42                | 21                |
|           | R  | 11                | 32                |

**Random Forest**

|           |    | Actual response   |                   |
|-----------|----|-------------------|-------------------|
|           |    | IR<br>(DAS28>3.2) | R<br>(DAS28 ≤3.2) |
| Predicted | IR | 42                | 20                |
|           | R  | 11                | 33                |

**XGBoost**

|           |    | Actual response   |                   |
|-----------|----|-------------------|-------------------|
|           |    | IR<br>(DAS28>3.2) | R<br>(DAS28 ≤3.2) |
| Predicted | IR | 42                | 20                |
|           | R  | 11                | 33                |

**Figure S3. Confusion matrix of logistic regression on TCZ monotherapy group**

|           |    | Actual response |              |
|-----------|----|-----------------|--------------|
|           |    | IR              | R            |
|           |    | (DAS28>3.2)     | (DAS28 ≤3.2) |
| Predicted | IR | 11              | 33           |
|           | R  | 5               | 52           |

IR=insufficient responder (DAS28 >3.2), R=sufficient responder (DAS28 ≤3.2)

**Supplementary Figure S4.** ROC curves of performance of final logistic regression model on test set MTX combination therapy and on TCZ monotherapy group.

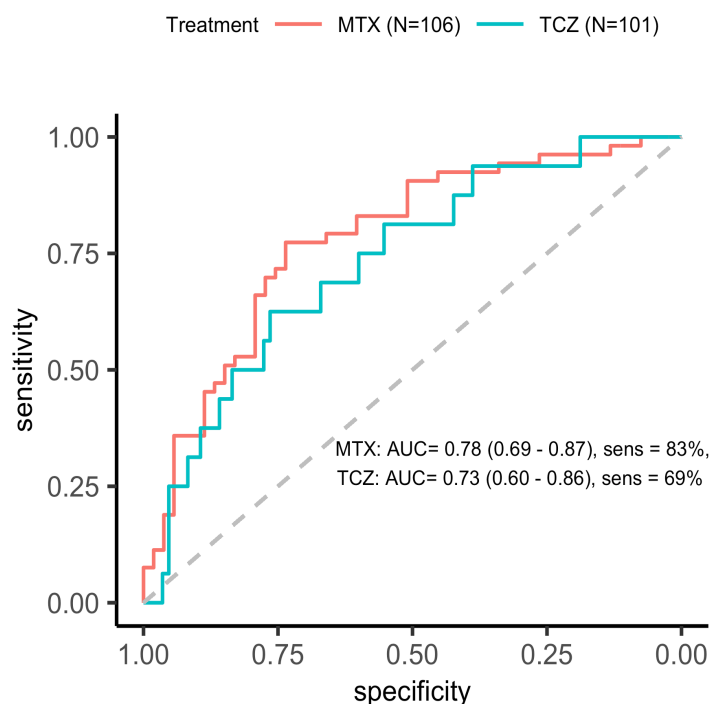

Features included in the model: TJC28, HAQ, BMI, smoking, ESR, DMARD/corticosteroid use. Sensitivity in both groups was determined at its highest point for which the specificity was at least 0.60.

**Table S2.** Logistic regression on complete dataset (MTX combination + TCZ monotherapy)

|                                     | Estimate | St. error | P-value                  |
|-------------------------------------|----------|-----------|--------------------------|
| Intercept                           | -3.15    | 0.73      | <1.73 x 10 <sup>-5</sup> |
| Treatment (MTX combi)               | 0.86     | 0.82      | 0.29                     |
| Riskfactor                          | 0.04     | 0.02      | 0.02                     |
| Treatment x riskfactor <sup>#</sup> | 0.03     | 0.02      | 0.09                     |

<sup>#</sup> Interaction term between predictors. Predictors included in calculation risk factor: BMI, HAQ, smoking, ESR, TJC28, DMARD/cortico use.
